# Supplementary material for: Synergistic Interferon-Alpha-Based Combinations for Treatment of SARS-CoV-2 and Other Viral Infections
Source: MDPI journal article supplement (doi:10.3390/v13122489), 2021-12-11
Supplement: s1 [file s1]

## Supplementary file

**Table S1.** Compounds, their suppliers, and catalogue numbers.

| Name                     | Cat #        | Company          |
|--------------------------|--------------|------------------|
| Recombinant human IFNa1b | 11343594     | ImmunoTools      |
| Recombinant human IFNa2a | 11343504     | ImmunoTools      |
| Recombinant human IFNa2b | 11343514     | ImmunoTools      |
| Recombinant human IFNb1a | 11343520     | ImmunoTools      |
| Recombinant human IFNb1b | 11343542     | ImmunoTools      |
| Recombinant human IFNg   | 11343534     | ImmunoTools      |
| Recombinant human IFNw1  | 11344784     | ImmunoTools      |
| Recombinant human IL28A  | 11340280     | ImmunoTools      |
| Recombinant human IL-29  | 11340290     | ImmunoTools      |
| Recombinant mouse IFNaa  | 10150-IF-050 | R&D Systems      |
| Camostat mesylate        | 16018        | Cayman Chemicals |
| Remdesivir               | 30354        | Cayman Chemicals |
| Lamivudine               | S1706        | Selleckchem      |
| Cycloheximide            | C7698-1g     | SigmaAldrich     |
| Pimodivir                | HY-12353A/CS | MedChemExpress   |
| EIDD-2801                | HY-135853    | MedChemExpress   |
| Ribavirin                | 0219606650   | MP Biomedicals   |
| NITD008                  | SML2409      | SigmaAldrich     |
| Sofosbuvir               | S2794        | Selleckchem      |
| Telaprevir               | S1538        | Selleckchem      |

**Table S2.** Statistical analysis of data presented in Fig. 1 using pairwise Wilcoxon Rank Sum Test with continuity correction.

| Calu-3  | IFNa1b | IFNa2a | IFNa2b | IFNb1a | IFNb1b | IFNg | IFNw1 | IL28a | IL29 | IP10 |
|---------|--------|--------|--------|--------|--------|------|-------|-------|------|------|
| IFNa2a  | 0,08   | -      | -      | -      | -      | -    | -     | -     | -    | -    |
| IFNa2b  | 0,70   | 0,38   | -      | -      | -      | -    | -     | -     | -    | -    |
| IFNb1a  | 0,10   | 0,66   | 0,40   | -      | -      | -    | -     | -     | -    | -    |
| IFNb1b  | 1,00   | 0,18   | 0,40   | 0,10   | -      | -    | -     | -     | -    | -    |
| IFNg    | 1,00   | 0,18   | 1,00   | 0,40   | 1,00   | -    | -     | -     | -    | -    |
| IFNw    | 0,40   | 0,18   | 0,83   | 0,10   | 1,00   | 0,70 | -     | -     | -    | -    |
| IL28a   | 0,51   | 1,00   | 0,40   | 0,83   | 0,40   | 0,40 | 0,70  | -     | -    | -    |
| IL29    | 0,27   | 0,38   | 0,70   | 0,10   | 0,40   | 1,00 | 1,00  | 0,70  | -    | -    |
| IP10    | 0,20   | 0,64   | 0,40   | 0,83   | 0,40   | 0,27 | 0,70  | 1,00  | 0,40 | -    |
| No_drug | 0,51   | 0,38   | 1,00   | 0,12   | 0,40   | 1,00 | 1,00  | 0,51  | 1,00 | 0,40 |

| Vero-E6 | IFNa1b | IFNa2a | IFNa2b | IFNb1a | IFNb1b | IFNg | IFNw1 | IL28a | IL29 | IP10 |
|---------|--------|--------|--------|--------|--------|------|-------|-------|------|------|
| IFNA2a  | 0,10   | -      | -      | -      | -      | -    | -     | -     | -    | -    |
| IFNA2b  | 0,10   | 1,00   | -      | -      | -      | -    | -     | -     | -    | -    |
| IFNB1a  | 0,08   | 0,38   | 0,38   | -      | -      | -    | -     | -     | -    | -    |
| IFNB1b  | 0,20   | 0,10   | 0,10   | 0,08   | -      | -    | -     | -     | -    | -    |
| IFNg    | 0,12   | 0,27   | 0,40   | 0,18   | 0,83   | -    | -     | -     | -    | -    |
| IFNW1   | 0,70   | 0,20   | 0,27   | 0,18   | 0,83   | 1,00 | -     | -     | -    | -    |
| IL28a   | 0,20   | 1,00   | 1,00   | 1,00   | 0,70   | 1,00 | 0,51  | -     | -    | -    |

|         |      |      |      |      |      |      |      |      |      |      |
|---------|------|------|------|------|------|------|------|------|------|------|
| IL29    | 0,08 | 0,26 | 0,38 | 0,18 | 0,08 | 0,50 | 0,38 | 1,00 | -    | -    |
| IP10    | 0,10 | 0,40 | 0,70 | 0,38 | 0,10 | 0,70 | 0,40 | 1,00 | 1,00 | -    |
| No_drug | 0,10 | 1,00 | 1,00 | 0,66 | 0,27 | 0,51 | 0,70 | 1,00 | 1,00 | 1,00 |

**Table S3.** Statistical analysis of data presented in Fig. 2 using pairwise Wilcoxon Rank Sum Test.

| <b>Mock, p1</b> | IFNa1b | IFNa2a | IFNb1a | IFNg   | no     |
|-----------------|--------|--------|--------|--------|--------|
| IFNa2a          | 0,0022 | -      | -      | -      | -      |
| IFNb1a          | 0,9372 | 0,0022 | -      | -      | -      |
| IFNg            | 0,0022 | 0,9372 | 0,0022 | -      | -      |
| no              | 0,0022 | 0,9372 | 0,0022 | 0,8182 | -      |
| IFNw1           | 0,3095 | 0,0087 | 0,4848 | 0,0022 | 0,0087 |

| <b>Virus, p1</b> | IFNa1b | IFNa2a | IFNb1a | IFNg   | no     |
|------------------|--------|--------|--------|--------|--------|
| IFNa2a           | 0,0022 | -      | -      | -      | -      |
| IFNb1a           | 0,1797 | 0,0022 | -      | -      | -      |
| IFNg             | 0,6991 | 0,0087 | 0,0022 | -      | -      |
| no               | 0,0022 | 0,6991 | 0,0022 | 0,0043 | -      |
| IFNw1            | 0,6991 | 0,0022 | 0,1797 | 0,4848 | 0,0022 |

| <b>Mock, p2</b> | IFNa1b | IFNa2a | IFNb1a | IFNg  | no   |
|-----------------|--------|--------|--------|-------|------|
| IFNa2a          | 0,065  | -      | -      | -     | -    |
| IFNb1a          | 0,699  | 0,065  | -      | -     | -    |
| IFNg            | 0,31   | 0,485  | 0,24   | -     | -    |
| no              | 0,093  | 0,937  | 0,093  | 0,394 | -    |
| IFNw1           | 0,589  | 0,132  | 0,699  | 0,589 | 0,18 |

| <b>Virus, p2</b> | IFNa1b | IFNa2a | IFNb1a | IFNg   | no     |
|------------------|--------|--------|--------|--------|--------|
| IFNa2a           | 0,3095 | -      | -      | -      | -      |
| IFNb1a           | 0,4848 | 0,026  | -      | -      | -      |
| IFNg             | 0,5887 | 0,4848 | 0,0649 | -      | -      |
| No               | 0,0649 | 0,3939 | 0,0087 | 0,1797 | -      |
| IFNw1            | 0,5887 | 0,0087 | 1      | 0,026  | 0,0087 |

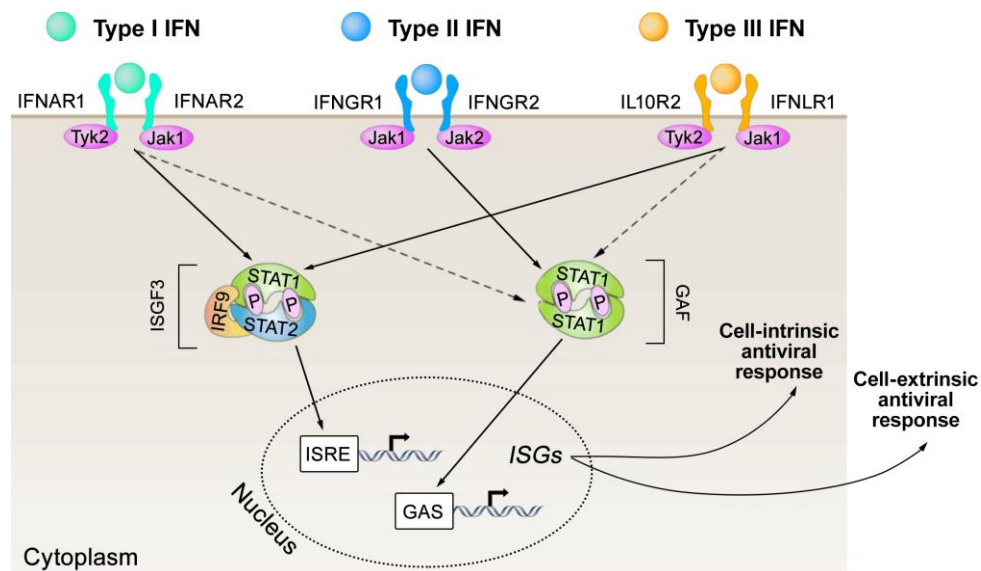

**Figure S1.** Three types of IFNs and their targets (adapted from <sup>10</sup>).

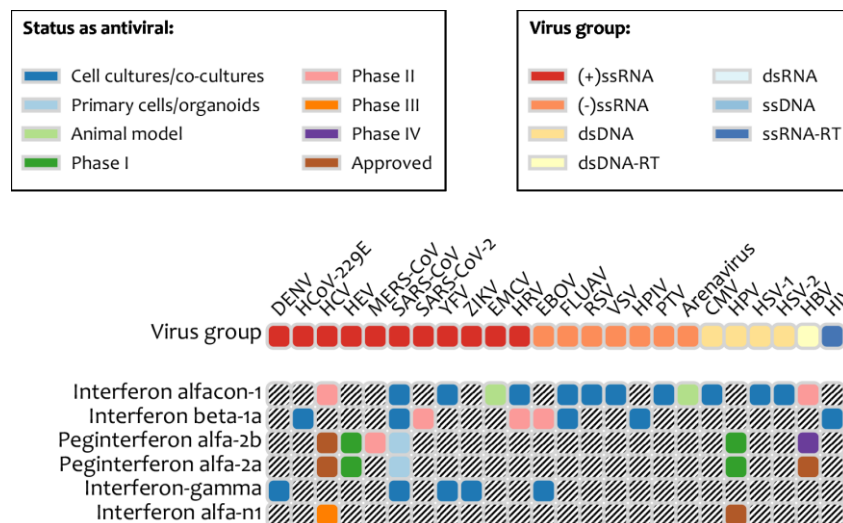

**Figure S2.** Developmental statuses of several natural and recombinant human IFNs against a range of pathogenic human viruses. Data was retrieved from our database of broad-spectrum antivirals (<http://drugvirus.info/>).

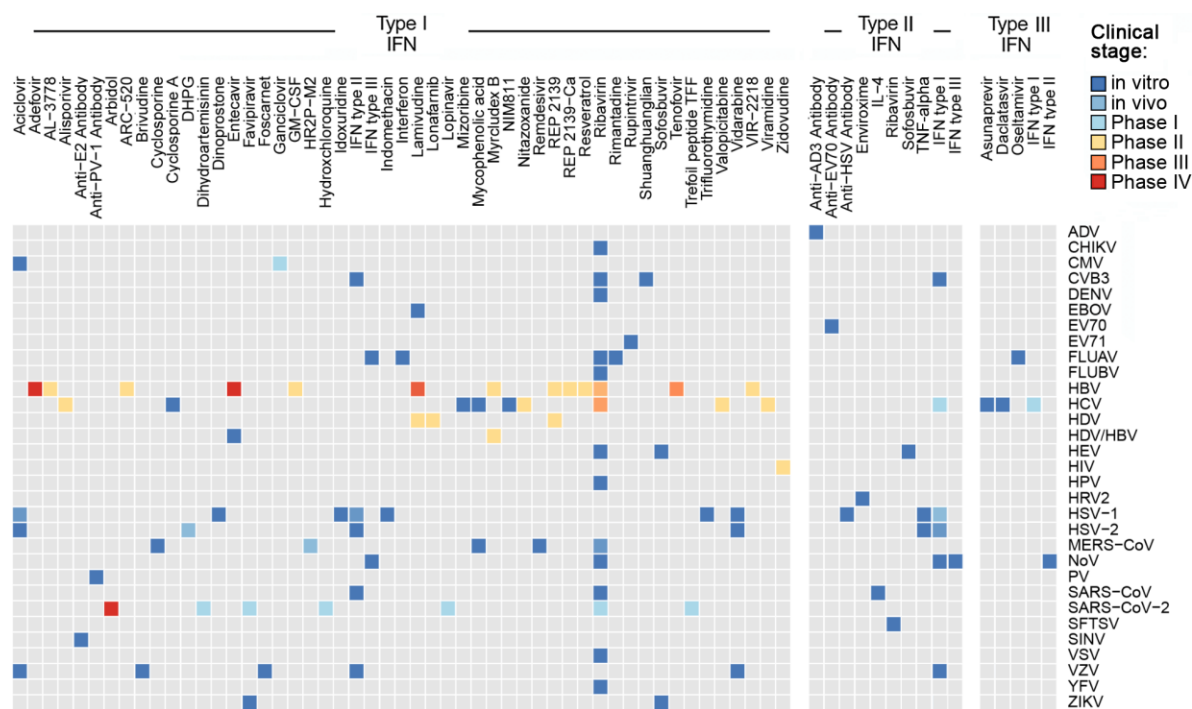

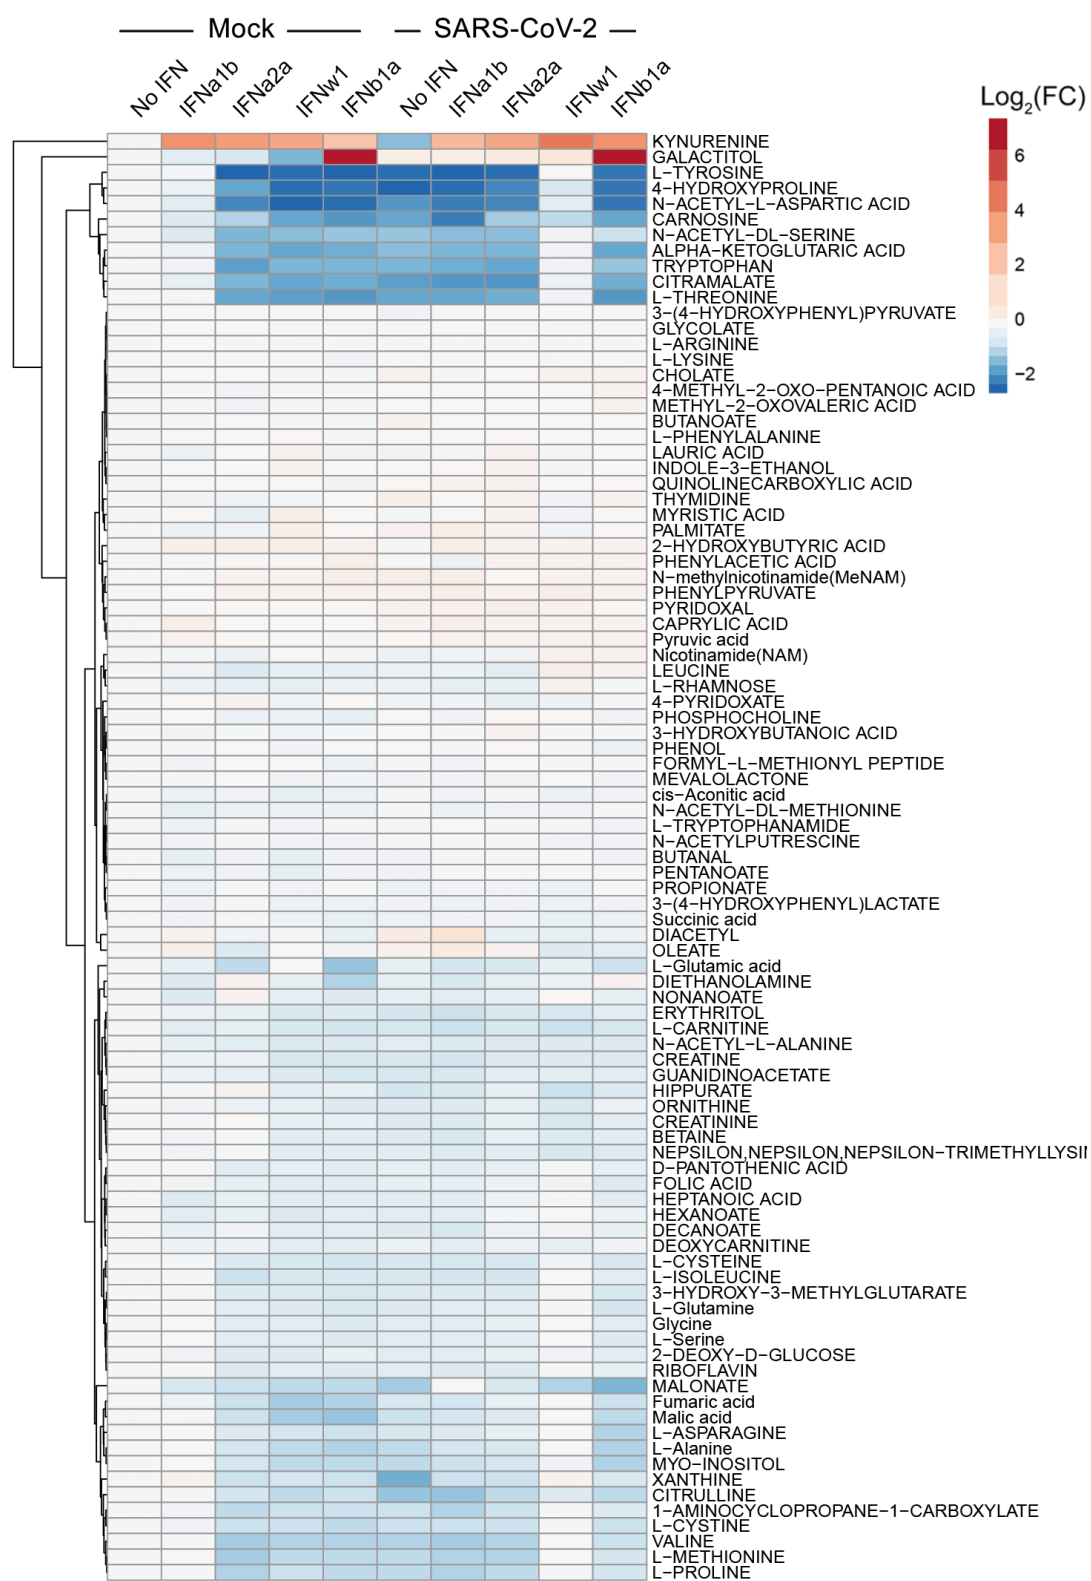

**Figure S4.** Metabolomic profiles of mock- and SARS-CoV-2-infected Calu-3 cells non-treated or treated with type I IFNs.

**a**

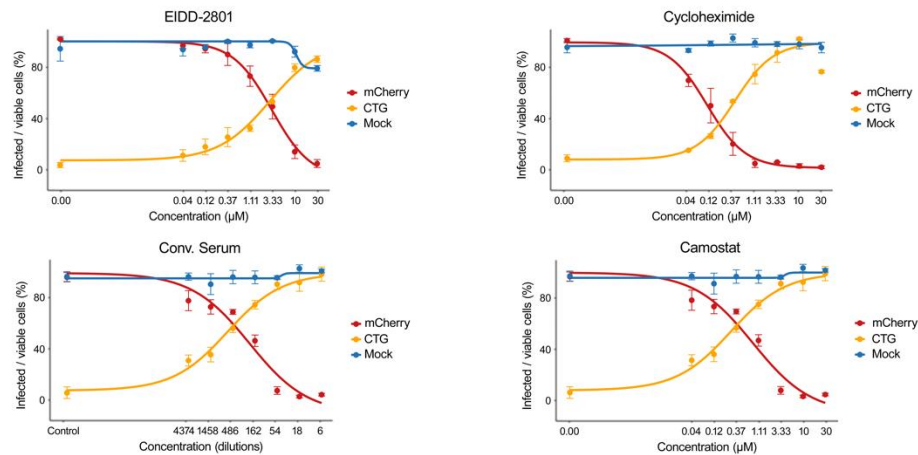

**b**

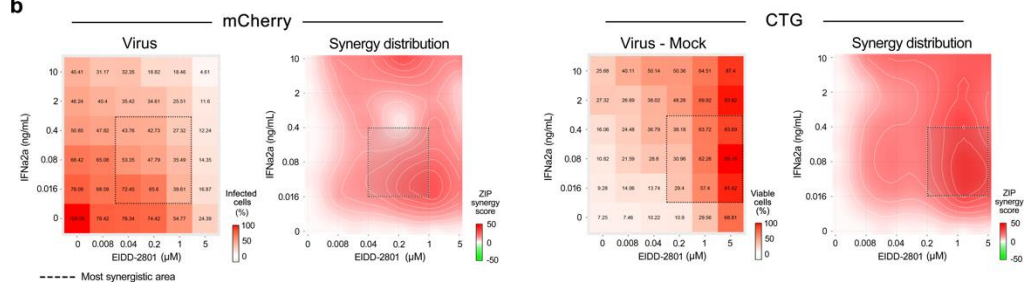

**c**

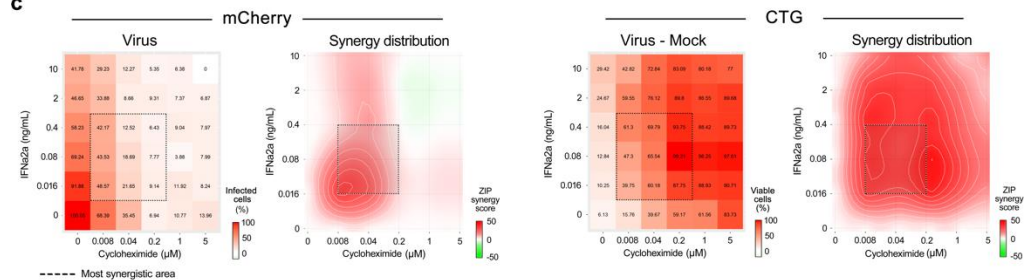

**d**

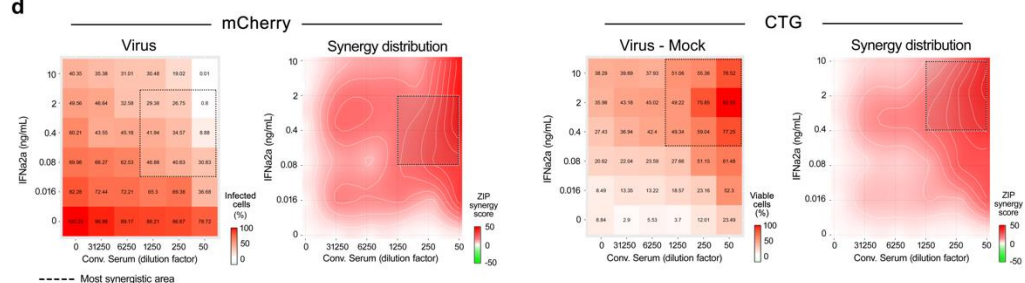

**e**

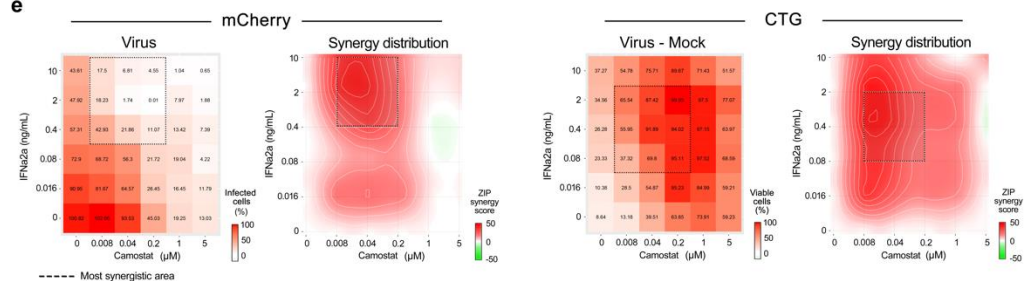





according to the log<sub>2</sub>-transformed expression values of the samples, expressed as fold-change relative to the nontreated mock-infected control. Cut-off - 2.

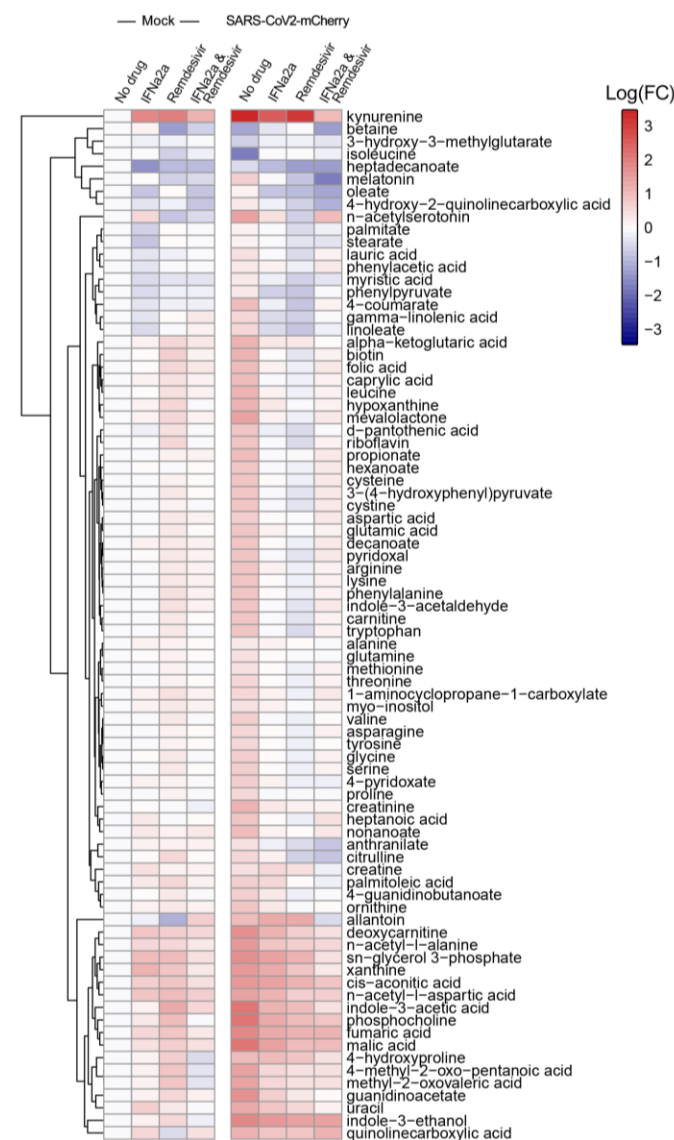

**Figure S7.** Effect of IFNa2a-remdesivir on metabolism in human lung organoids (LOs). LOs were treated with 0,5  $\mu$ M remdesivir, 5 ng/mL IFNa2a, a combination thereof, or vehicle; then infected with SARS-CoV-2-mCherry (moi = 0,1) or mock. After 48 h, the cell culture supernatants were collected, and metabolite levels were determined by LC-MS/MS. A heatmap of the most affected metabolites is shown. Each cell is colored according to the log<sub>2</sub>-transformed profiling values of samples, expressed as fold-change relative to the mock control.



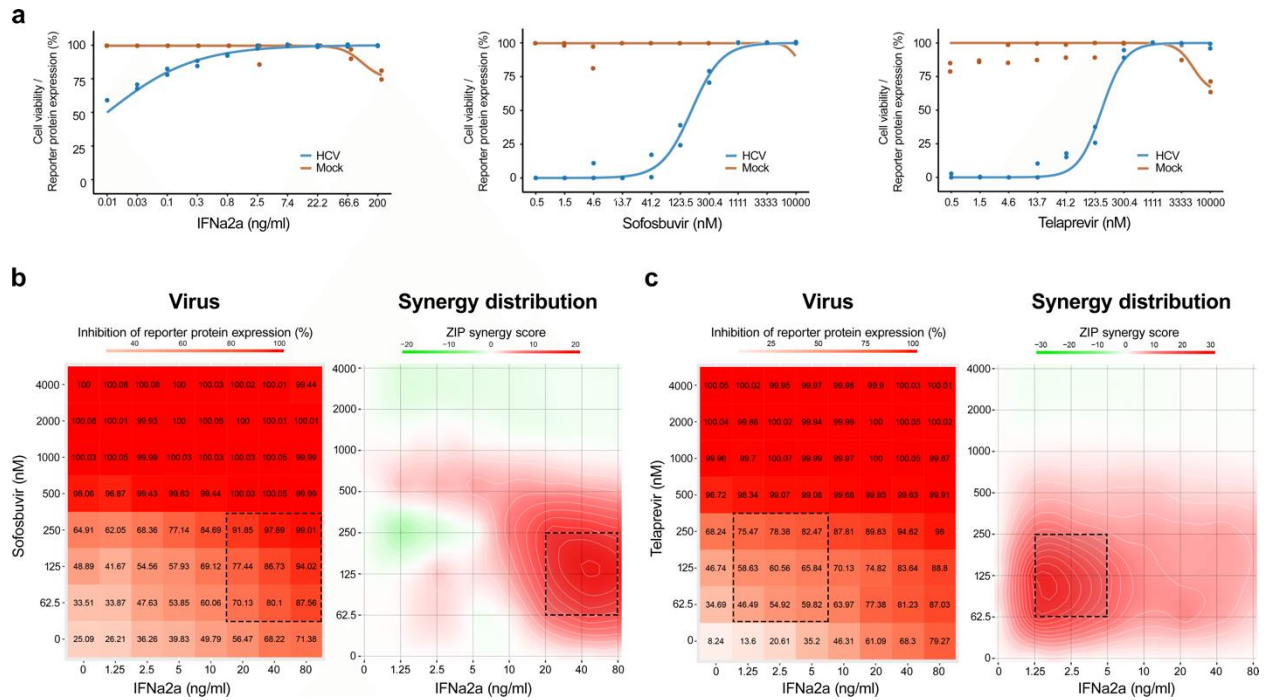

**Figure S8.** Combinations of IFNa2a with sofosbuvir or telaprevir reduce HCV-mediated GFP expression in Huh-7.5 cells. (a) Huh-7.5 cells were treated with increasing concentrations of IFNa2a, sofosbuvir, or telaprevir and infected with HCV. After 72 h, the HCV-mediated GFP expression was measured (blue curves). The total number of cells was used as marker for cytotoxicity (red curves). Mean  $\pm$  SD;  $n = 3$ . (b,c) The interaction landscape of IFNa2a-sofosbuvir and IFNa2a-telaprevir, measured using HCV-mediated GFP expression in Huh-7.5 cells (left panels). The interaction landscapes of drug combinations (right panels).

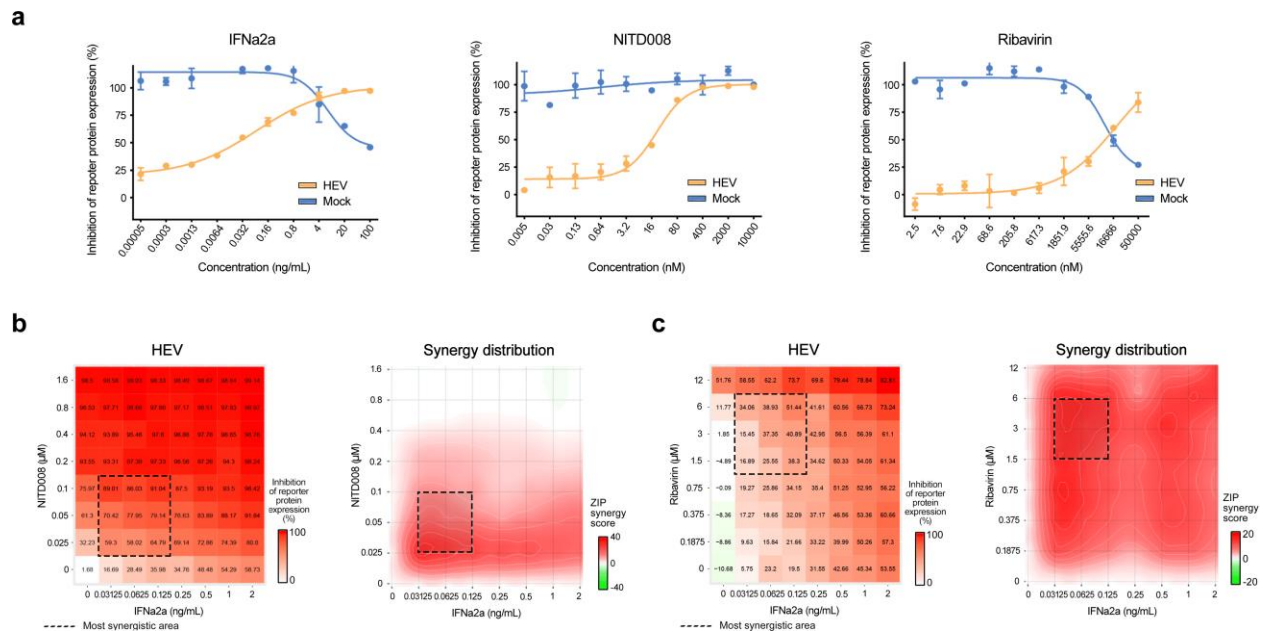

**Figure S9.** Combinations of IFNa2a with ribavirin or NITD008 reduce HEV-mediated GFP expression in Huh-7.5 cells. (a) Huh-7.5 cells were transfected with p6-GFP sub-genomic HEV RNA or mock. After 24 h cells were treated with increasing concentrations of IFNa2a, NITD008 or ribavirin. After 72 h, the HEV-

mediated GFP expression was measured (blue curves). Total number of cells was used as marker for cytotoxicity (red curves). Mean  $\pm$  SD;  $n = 3$ . (b,c) The interaction landscape of IFNa2a-ribavirin and IFNa2a-NITDD008 were measured using HEV-mediated GFP expression in Huh-7.5 cells (left panels). The interaction landscapes of drug combinations (right panels).

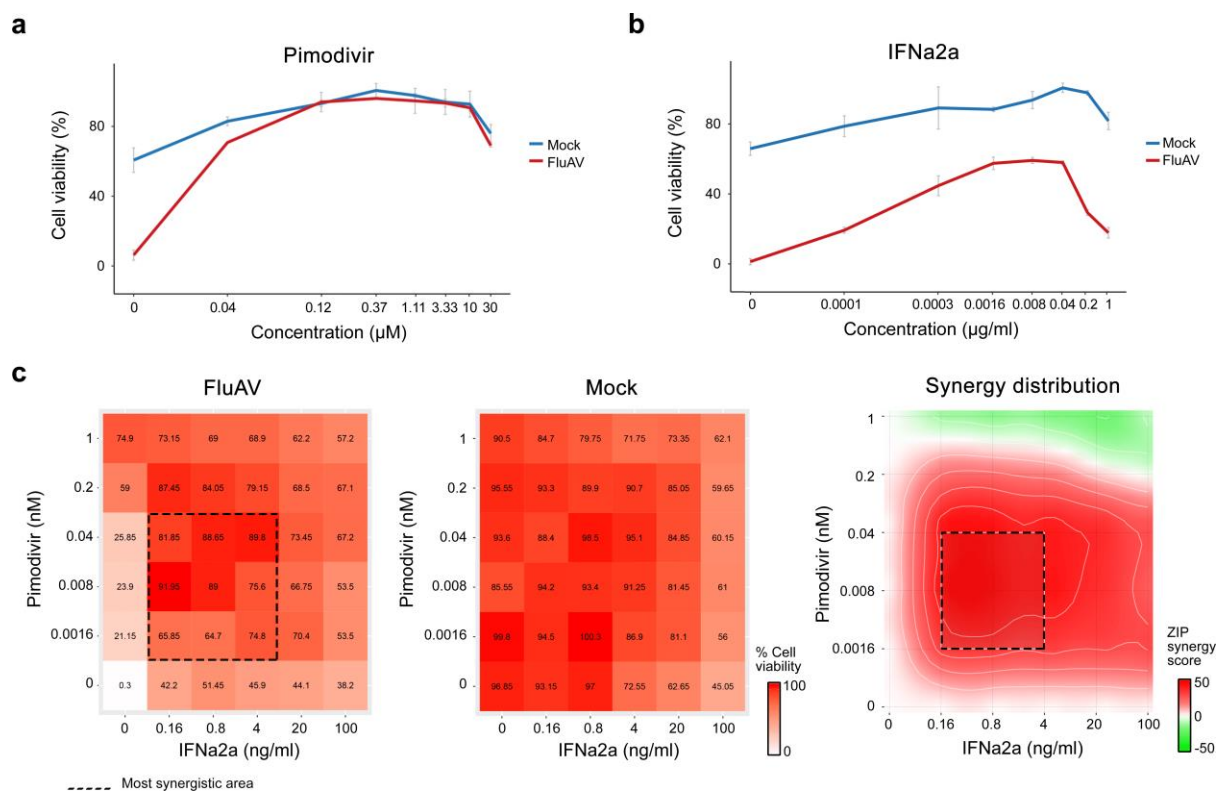

**Figure S10.** Combination of pimodivir-IFNa2a reduces FluAV infection in A549 cells. (a,b) A549 cells were treated with increasing concentrations of pimodivir or IFNa2a and infected with the FluAV (moi = 0.5) or mock. After 48 h, cell viability was determined using a CTG assay. Mean  $\pm$  SD;  $n = 3$ . (c) The interaction landscape of IFNa2a and pimodivir in FluAV- and mock infected A549 cells measured using CTG (left panels). The interaction landscape of both drugs showing synergy of the drug combination (right panel).

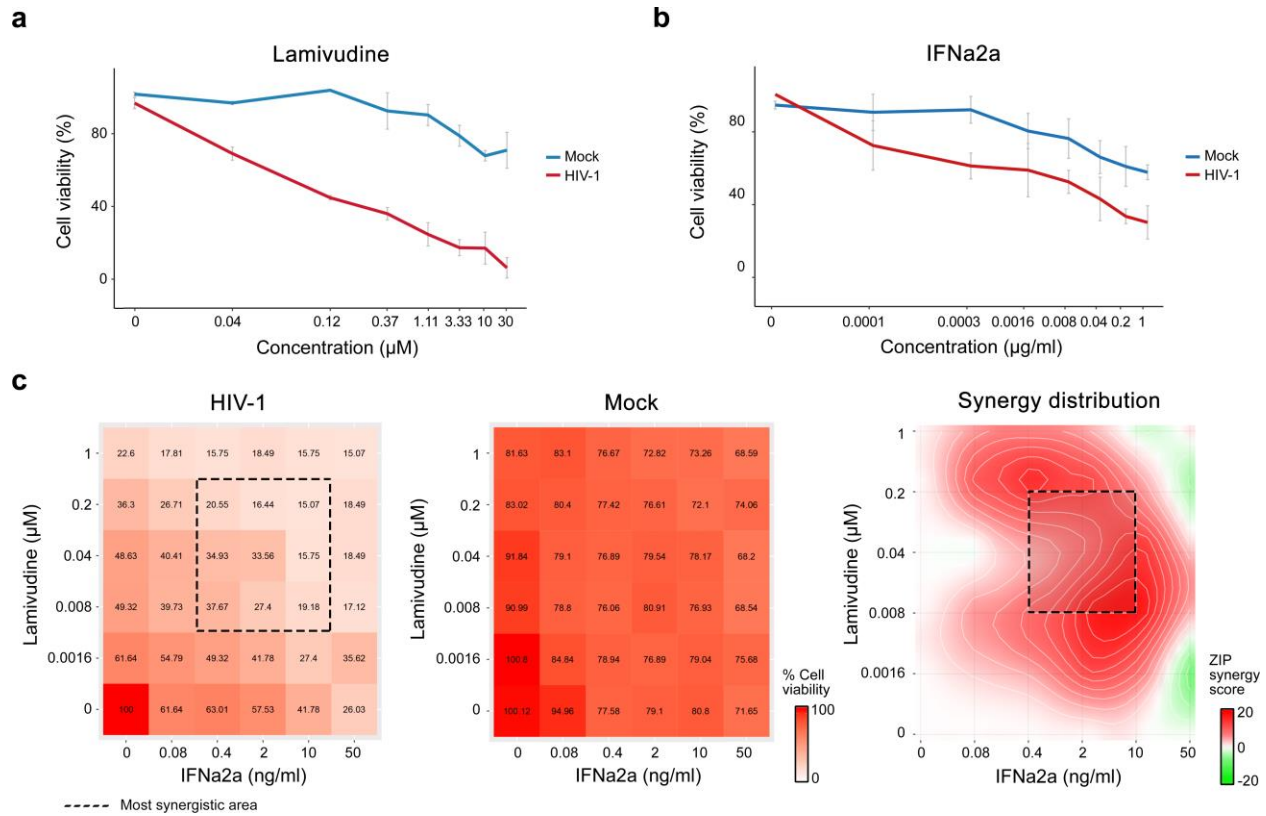

**Figure S11.** Combination of lamivudine-IFNa2a reduces HIV-1 virus infections in TZM-bl cells. **(a,b)** TZM-bl cells were treated with increasing concentrations of lamivudine or IFNa2a and infected with the HIV-1 or mock. After 48 h, the HIV-mediated luciferase expression was measured. Viability of mock-infected cells was determined using the CTG assay. Mean  $\pm$  SD;  $n = 3$ . **(c)** The interaction landscape of IFNa2a and lamivudine in HIV-1- and mock-infected TZM-bl cells measured using HIV-1-mediated luciferase expression and CTG assay, respectively (left panels). The interaction landscape of both drugs showing synergy of their combination (right panel).
